# Supplementary material for: Enhanced electrocatalytic oxygen evolution of α-Co(OH)2nanosheets on carbon nanotube/polyimide films
Source: Royal Society of Chemistry journal article supplement (doi:10.1039/c6nr00614k), 2016-01-01
Supplement: c6nr00614k1.pdf [file c6nr00614k1.pdf]

**Supplementary Information For**  
**Enhanced electrocatalytic oxygen evolution of  $\alpha$ -Co(OH)<sub>2</sub> nanosheets on carbon  
nanotube/polyimide film**

Yimin Jiang, Xin Li, Tingxia Wang, Chunming Wang\*

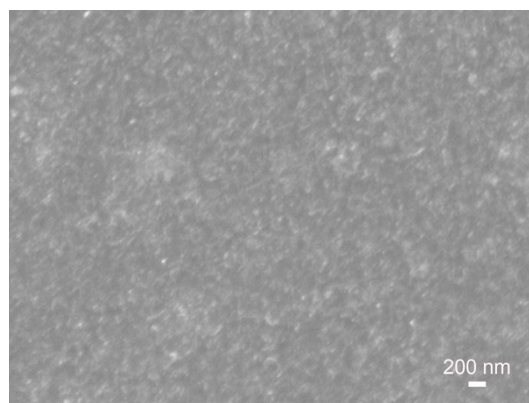

Figure S1 SEM image of pristine PI/CNT film.

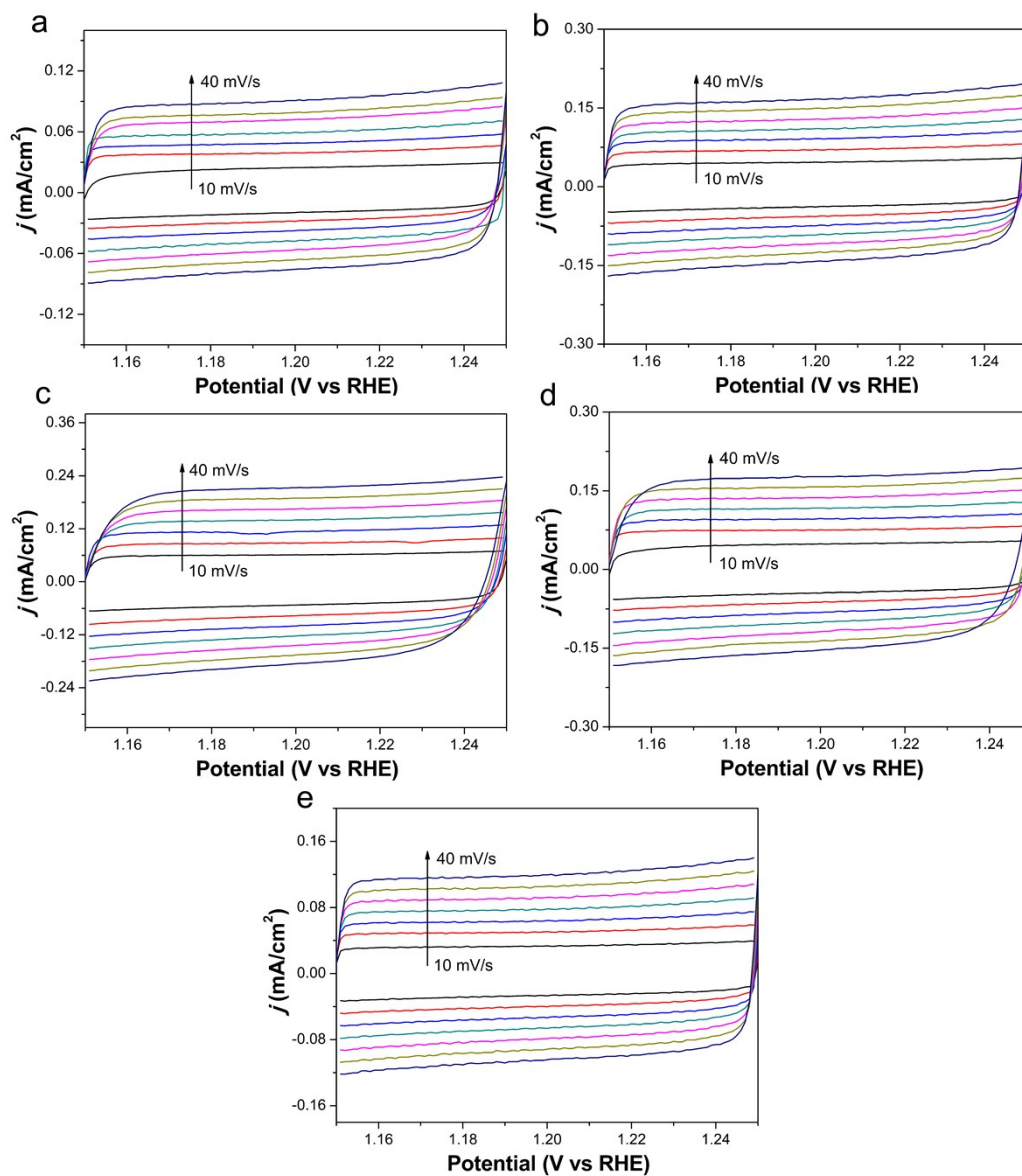

Figure S2 CVs of the  $\text{Co(OH)}_2$  products at (a) 0.5, (b) 1, (c) 3, (d) 4 and (e) 5 min in 1 M KOH with different scan rates from 10 to 40 mV/s.

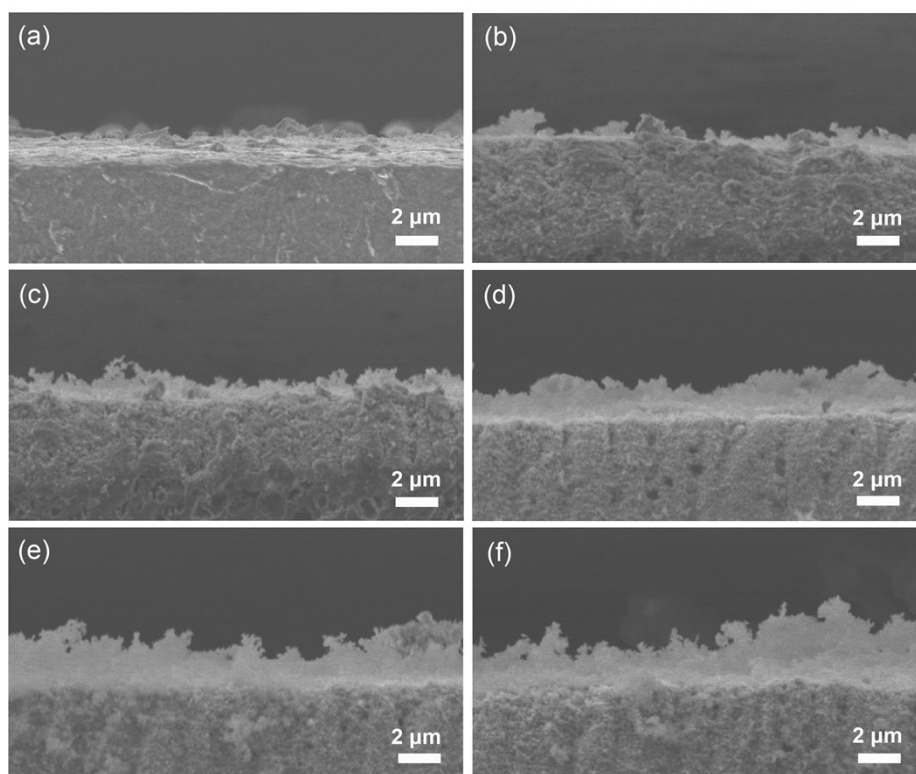

Figure S3 SEM cross-sectional images of the  $\text{Co(OH)}_2$  films at different deposition times (min): (a) 0.5, (b) 1, (c) 2, (d) 3, (e) 4, (f) 5.

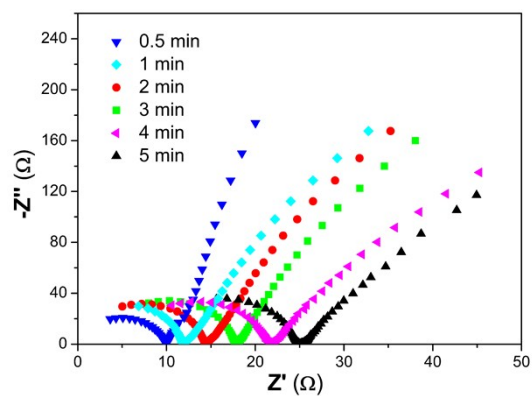

Figure S4 EIS of the PI/CNT- $\text{Co(OH)}_2$  films at an overpotential of 0.2 V in 1 M KOH.

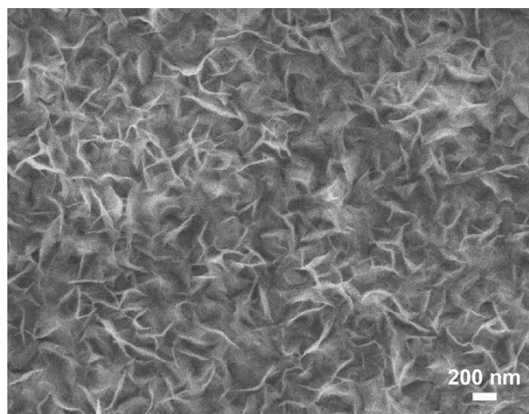

Figure S5 SEM image of the  $\text{Co}(\text{OH})_2$  nanosheets after 10 h OER test.
